# Supplementary material for: An Investigation on the Application of Pulsed Electrodialysis Reversal in Whey Desalination
Source: MDPI journal article supplement (doi:10.3390/ijms20081918), 2019-04-18
Supplement: s1 [file s1]

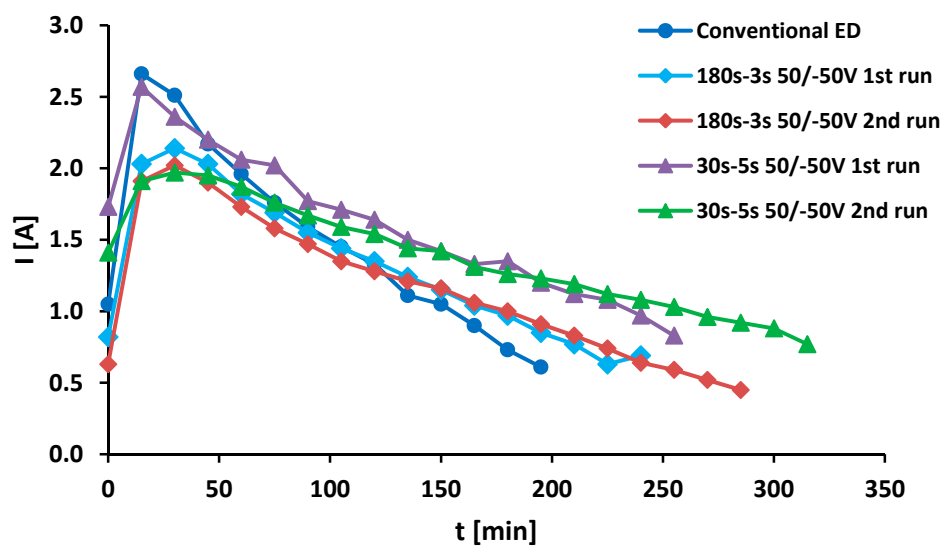

Figure 1. Current during ED desalination

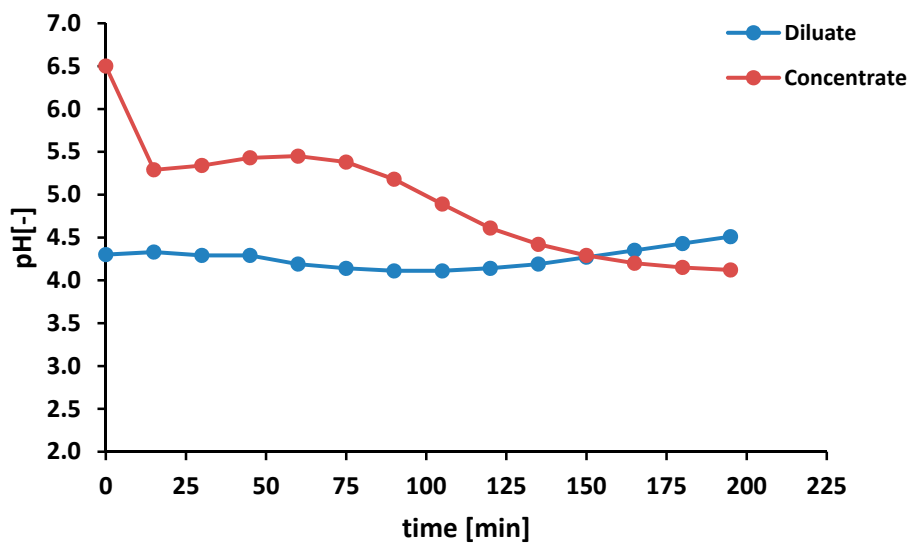

Figure 2. Diluate and concentrate pH of acidic whey during conventional ED desalination
